# Supplementary material for: Results From a Multimethod Exploratory Scale Development Process to Measure Authoritarian Provider Attitudes in Democratic Republic of Congo and Togo
Source: PubMed Central journal article supplement (PMC10698232; doi:10.9745/ghsp-d-22-00421), 2023-11-30
Supplement: GHSP-D-22-00421-supplement.pdf [file GHSP-D-22-00421-supplement.pdf]

## SUPPLEMENT

**TABLE S1. Provider Attitude Survey Items – Phase 1 Descriptive Results**

|    |                                                                                                                                          | <b>Strongly Agree</b> | <b>Agree</b> | <b>Neutral</b> | <b>Disagree</b> | <b>Strongly Disagree</b> |
|----|------------------------------------------------------------------------------------------------------------------------------------------|-----------------------|--------------|----------------|-----------------|--------------------------|
|    | <b>Attitudes related to perceptions of patients</b>                                                                                      |                       |              |                |                 |                          |
| 1  | Patients I care for are not educated enough make good health decisions for themselves                                                    | 21.6%                 | 36.0%        | 12.2%          | 28.6%           | 1.7%                     |
| 2  | Patients I care for are not grateful for the efforts I make when I care for them                                                         | 14.3%                 | 25.1%        | 11.3%          | 44.4%           | 4.9%                     |
| 3  | I consider my patients to be worthy of respect no matter how poor or low status they are                                                 | 64.4%                 | 33.5%        | 0.3%           | 1.4%            | 0.4%                     |
| 4  | Patients often treat me without respect, so it's hard to treat them with respect                                                         | 2.1%                  | 3.9%         | 2.5%           | 75.4%           | 16.1%                    |
| 5  | Patients I care for make bad decisions regarding their health no matter what I tell them                                                 | 6.8%                  | 22.5%        | 10.8%          | 55.7%           | 4.2%                     |
| 6  | My patients will work hard to improve their health when they are given the proper information                                            | 38.5%                 | 50.7%        | 4.9%           | 5.5%            | 0.4%                     |
|    | <b>Attitudes related to professional role</b>                                                                                            |                       |              |                |                 |                          |
| 7  | My role is to provide clinical care, not to teach patients about how to take care of themselves                                          | 7.4%                  | 11.3%        | 1.7%           | 64.4%           | 15.3%                    |
| 8  | I do not spend a lot of thought about what Patients may think about their experience at the clinic as I have other things to worry about | 4.8%                  | 5.9%         | 5.5%           | 72.2%           | 11.6%                    |
| 9  | An important part of my job is to communicate with patients to make sure they understand their care                                      | 51.5%                 | 44.0%        | 1.4%           | 2.4%            | 0.8%                     |
| 10 | I try hard to think about all of the patients' health care needs not just solving their immediate problem                                | 34.4%                 | 51.1%        | 3.0%           | 10.5%           | 1.0%                     |

|    |                                                                                                                | <b>Strongly Agree</b> | <b>Agree</b> | <b>Neutral</b> | <b>Disagree</b> | <b>Strongly Disagree</b> |
|----|----------------------------------------------------------------------------------------------------------------|-----------------------|--------------|----------------|-----------------|--------------------------|
| 11 | I was trained to provide clinical care, being respectful to every patient is not my job                        | 8.1%                  | 15.7%        | 3.5%           | 59.4%           | 13.3%                    |
| 12 | When medicine is given, it is important that I explain well what it does for the patient and how it helps them | 57.7%                 | 39.4%        | 1.5%           | 1.1%            | 0.3%                     |
| 13 | I think it is important to spend enough time with each patient, even if I have other job demands               | 43.7%                 | 41.9%        | 6.4%           | 7.4%            | 0.6%                     |
| 14 | My job is to diagnose and treat parents not to be a health educator                                            | 2.3%                  | 5.4%         | 2.2%           | 68.4%           | 21.6%                    |
| 15 | Engaging patients in discussions leads to better health outcomes than just telling them what is best for them  | 42.3%                 | 47.1%        | 3.3%           | 6.6%            | 0.7%                     |
|    | <b>Gender norms</b>                                                                                            |                       |              |                |                 |                          |
| 16 | A man should have the final word about decisions in his home                                                   | 35.4%                 | 35.2%        | 4.4%           | 21.3%           | 3.7%                     |
| 17 | It is the man who takes the initiative to have sex with his wife                                               | 10.3%                 | 16.5%        | 12.3%          | 52.9%           | 8.1%                     |
| 18 | A women most important role is to take care of her home and cook for her family                                | 14.8%                 | 24.0%        | 6.6%           | 47.0%           | 7.6%                     |
| 19 | If a woman has a good idea, her husband should listen even if he disagrees                                     | 46.8%                 | 46.8%        | 2.7%           | 3.3%            | 0.4%                     |
| 20 | Men and women should decide together about how many children to have                                           | 58.7%                 | 36.7%        | 1.5%           | 2.4%            | 0.6%                     |
| 21 | A man is expected to discipline his women                                                                      | 18.7%                 | 38.8%        | 8.5%           | 27.4%           | 6.7%                     |
| 22 | Men should help take care of the children in the household                                                     | 43.5%                 | 48.8%        | 2.4%           | 5.0%            | 0.4%                     |
| 23 | There is never a good reason for a man to beat his wife                                                        | 34.0%                 | 28.2%        | 8.6%           | 25.3%           | 3.9%                     |

**TABLE S2. French Version of Final Survey Items Retained in Validated Scale**

| <b>Scale Items</b>                                                                                                                                                                        |
|-------------------------------------------------------------------------------------------------------------------------------------------------------------------------------------------|
| Mes patients dont je m'occupe ne sont pas assez capables pour prendre de bonnes décisions pour leur santé.                                                                                |
| Mes patients doivent apprécier des efforts que je leur fournis quand je m'occupe d'eux                                                                                                    |
| Il faut traiter les patients avec respect même s'ils ne me traitent pas avec respect                                                                                                      |
| Les patients doivent toujours respecter les prestataires, quelle que soit la qualité des soins qu'ils prodiguent                                                                          |
| Mes patients fourniront beaucoup d'efforts pour améliorer leur santé si on leur donne les bonnes informations.                                                                            |
| Le rôle d'un prestataire est de diagnostiquer les patients et leur fournir des soins cliniques, et non pas d'apprendre aux patients comment améliorer leur santé et prévenir les maladies |
| J'ai la responsabilité de veiller à ce que les patients aient leur mot à dire sur les soins qu'ils reçoivent.                                                                             |
| Il est important d'écouter les patients pour s'assurer qu'ils comprennent les soins dont ils ont besoin                                                                                   |
| Mon rôle en tant que prestataire est de résoudre les problèmes médicaux immédiats de mes patients seulement, sans m'occuper d'autre chose                                                 |
| Lorsque des médicaments sont administrés, il est important que j'explique bien aux patients comment ils agissent et en quoi cela va leur être bénéfique.                                  |
| Mon travail consiste à diagnostiquer et à traiter les patients, pas à être un éducateur de santé pour chaque patient.                                                                     |
| Un homme doit avoir le dernier mot sur les décisions prises chez lui                                                                                                                      |
| Une femme doit obéir à son mari par rapport à tout                                                                                                                                        |
| Il est important qu'un père soit présent dans la vie de ses enfants, même s'il n'est plus avec la mère.                                                                                   |
